# Supplementary material for: The demonstration of a theory-based approach to the design of localized patient safety interventions
Source: PubMed Central journal article supplement (PMC3854455; doi:10.1186/1748-5908-8-123), 2013-10-16
Supplement: 1748-5908-8-123-S2.pdf [file 1748-5908-8-123-S2.pdf]

## FOCUS GROUP TOPIC GUIDE EXAMPLE

### Practitioner barriers to checking the position of NG tubes

#### Introduction and informed consent: 10mins

- Welcome
- Introduce topic: practitioner barriers to checking the position of NG tubes
- State purpose of focus groups (e.g. use to develop intervention etc)
- Discussion take about 40-60 minutes, ask about your views in relation to checking the position of nasogastric tubes
- Will be recording the discussion
- Assure of confidentiality and anonymity
- Voluntary participation and right to withdraw without giving a reason

#### Introductions and info about practitioners:

- Brief introduction – name, profession, area of work, years of experience

#### Define problem:

- Feeding through misplaced ng tubes
- Briefly explain the common approach to patient safety alerts, the behaviour change gap and our approach to break down/fix the problem
- Define problem behaviour: sending for X-ray as first line method (rather than checking the pH of the aspirate, or despite obtaining aspirate < 5.5)

#### Barriers to checking the pH of the aspirate and relying on the result in order to commence feeding

1. Present list of possible barriers (**exercise 1**)
  - a. Talk through each type of barrier in the context of ng tubes problem behaviour
  - b. Then ask to rate the top 4-5 they believe exist within the trust
2. Present preliminary results of questionnaire
  - a. Determinant scores were ranked (based on number of times rated as a strong barrier by individuals) to assess different aspects of implementation difficulties. Mean scores for each determinant were also computed
  - b. The determinant 'social influences' was ranked as a strong barrier by more participants than any other determinant area, which was followed by 'skills', and 'environmental context and resources'
  - c. High scores (4/5) represent barriers – no areas produced a mean score > 3, suggesting staff do not perceive barriers to ensuring patients are not sent for an x-ray unless it is impossible to obtain aspirate or pH level is > 5.0
  - d. However, audit data suggests otherwise (most patients are sent for an x-ray)
  - e. Discuss similarities and differences
3. Arrive at a general consensus and decide which areas they think we should target
  - a. Create definitive list of top 4-5 barriers
4. Devise set of strategies to tackle barriers (**exercise 2**)
  - a. Take in list of taxonomy techniques mapped to determinant areas (**discuss with attendees where possible**)

### **Exercise 1: Practitioner barriers to checking the position of NG tubes**

Please rate the following areas in terms of the largest (1) and smallest (11) barriers to ensuring that patients are not sent for an x-ray unless it is impossible to obtain aspirate or the pH level is > 5.0

**Knowledge** (about checking pH level of the aspirate as the first line method to confirm tube position – *as opposed to sending for an X-ray as first line method*)

- Staff unaware that they should do this
- Do not know why it is important
- Do not agree with the guidelines
- Don't know where to find information to help

/11

**Skills** (that enable staff to check pH level of aspirate as the first line method to confirm tube position – *as opposed to sending for an X-ray as first line method*)

- Staff do not have the necessary skills
- Training isn't offered regularly enough
- Training is not adequate

/11

**Professional identity**

- Staff do not think it's an integral part of their duty of care
- Do not think it's their responsibility
- Are not clear about what their role should be in the process

/11

**Beliefs about capabilities**

- Staff are not confident about the aspirate method
- Do not find it easy to use the aspirate method
- Have previously encountered problems when using the aspirate method

/11

**Beliefs about consequences**

- Staff don't think it matters too much if they send for an x-ray first line or if even if they get an aspirate within the necessary range
- Don't think it will be a bad thing if the patient is sent for an x-ray first line
- Staff think the costs outweigh the benefits of sending for aspirate first line

/11

**Motivation and goals**

- Staff generally intend to send for an x-ray first line or even if aspirate in specified range
- Other guidelines conflict with the ng tubes guidelines about checking the aspirate as first line
- Other priorities get in the way

/11

**Cognitive processes, memory and decision making**

- Staff think it's justified to send for x-ray first line or even if ph within the range
- Staff forget to check the aspirate first line
- Staff do not usually check the aspirate first line

/11

**Environmental context and resources**

- The necessary resources are not available
- Verbal and written communication is not clear enough between staff
- There is not a good enough system in place to ensure aspirate is used as first line

\_\_\_/11

**Social Influences**

- Other staff do not encourage testing the aspirate first line
- Most staff don't test the aspirate first line (or generally tend to send for an x-ray)
- Superiors do not express that they would like staff to test the aspirate first line

\_\_\_/11

**Emotion**

- Staff are anxious about having to trust a pH level
- Staff worry about trusting the ph level
- Staff feel frustrated about having to test the ph level

\_\_\_/11

**Behavioural regulation**

- Staff do not plan how they will ensure they check ph level as first line
- Staff get plans mixed up regarding checking the ph level
- Things are too unpredictable for staff to make plans to check ph level first time

\_\_\_/11

**Any barriers that we have missed...?**

**Exercise 2: Top 5 barriers, intervention strategies, and coded techniques**

| Top 5 barriers | Suggested intervention strategies | Coded techniques |
|----------------|-----------------------------------|------------------|
|                |                                   |                  |
|                |                                   |                  |
|                |                                   |                  |
|                |                                   |                  |
|                |                                   |                  |
